# Supplementary material
Source: Elsevier journal article supplement (https://authors.library.caltech.edu/39280/13/mmc2.pdf)
Supplement: mmc2 [file mmc2.pdf]

| Sample description | Sample location | Date collected | Mo [nM] (1 $\sigma$ ) |
|--------------------|-----------------|----------------|-----------------------|
| Heart Lake         | H               | 16-Jul-08      | <0.01                 |
|                    | H               | 5-Jul-09       | 0.02 (0.02)           |
| Heart Lake outflow | HO              | 16-Jul-08      | 0.02 (0.01)           |
|                    | HO              | 17-May-09      | 0.05 (0.01)           |
|                    | HO              | 15-Jun-09      | 0.09 (0.02)           |
|                    | HO              | 5-Jul-09       | 0.08 (0.02)           |
|                    | HO              | 15-Jul-09      | 0.09 (0.02)           |
| Castle Lake inflow | I               | 16-May-09      | 0.05 (0.02)           |
|                    | I               | 9-Jun-09       | 0.08 (0.01)           |
|                    | I               | 6-Jul-09       | 0.15 (0.01)           |
| Snowmelt           | S1              | 2-May-09       | 0.14 (0.02)           |
|                    | S1              | 15-May-09      | 0.01 (0.01)           |
|                    | S1              | 9-Jun-09       | 0.14 (0.01)           |
|                    | S1              | 10-Aug-09      | 0.05 (0.01)           |
|                    | S2              | 4-Apr-09       | 0.32 (0.11)           |
|                    | S2              | 3-May-09       | 0.13 (0.11)           |
|                    | S2              | 16-May-09      | 0.08 (0.01)           |
|                    | S2              | 9-Jun-09       | 0.05 (0.01)           |
|                    | S2              | 10-Aug-09      | <0.01                 |
| Runoff along trail | W1              | 3-May-09       | 0.20 (0.03)           |
|                    | W2              | 3-May-09       | 0.14 (0.02)           |
|                    | W3              | 3-May-09       | 0.15 (0.01)           |
|                    | W3              | 16-May-09      | 0.09 (0.02)           |
|                    | W4              | 3-May-09       | 0.16 (0.01)           |
|                    | W4              | 16-May-09      | <0.01                 |
|                    | W5              | 4-Apr-09       | 0.48 (0.09)           |
|                    | W5              | 3-May-09       | 0.09 (0.06)           |
|                    | W5              | 16-May-09      | 0.08 (0.01)           |
|                    | W6              | 16-May-09      | 0.20 (0.02)           |
| Waterfalls         | C1              | 9-Jun-09       | <0.01                 |
|                    | C3              | 4-Apr-09       | 0.59 (0.08)           |
|                    | C4              | 17-May-09      | 0.08 (0.02)           |
| Springs            | M1              | 20-Sep-08      | 0.83 (0.22)           |
|                    | M1              | 2-May-09       | 0.43 (0.02)           |
|                    | M1              | 16-May-09      | 0.31 (0.02)           |
|                    | M1              | 9-Jun-09       | 0.41 (0.03)           |
|                    | M1              | 6-Jul-09       | 0.52 (0.03)           |
|                    | M1              | 11-Aug-09      | 0.51 (0.01)           |
|                    | M2              | 20-Sep-08      | 1.2 (0.3)             |
|                    | M2              | 4-Apr-09       | 0.8 (0.1)             |
|                    | M2              | 16-May-09      | 0.29 (0.04)           |
| M2                 | 9-Jun-09        | 0.58 (0.03)    |                       |

|                         |    |           |             |
|-------------------------|----|-----------|-------------|
|                         | M2 | 6-Jul-09  | 1.18 (0.02) |
|                         | M2 | 11-Aug-09 | 1.23 (0.05) |
|                         | M3 | 16-Jul-08 | 0.24 (0.06) |
|                         | M3 | 3-May-09  | 0.20 (0.02) |
|                         | M3 | 15-May-09 | 0.14 (0.04) |
|                         | M3 | 9-Jun-09  | 0.03 (0.03) |
|                         | M3 | 6-Jul-09  | 0.18 (0.03) |
|                         | M3 | 11-Aug-09 | 0.15 (0.04) |
|                         | M4 | 16-Jun-09 | 0.35 (0.04) |
|                         | M4 | 6-Jul-09  | 0.50 (0.04) |
| Spring near parking lot | P1 | 3-May-09  | 0.20 (0.02) |
| Lake water under ice    | E1 | 16-May-09 | 0.07 (0.02) |
|                         | E2 | 4-Apr-09  | 0.72 (0.07) |
|                         | D1 | 4-Apr-09  | 0.94 (0.14) |
|                         | T6 | 3-May-09  | 0.35 (0.01) |
| Forest runoff           | B1 | 15-Nov-08 | 0.63 (0.04) |
|                         | B1 | 28-Feb-09 | 0.71 (0.11) |
|                         | B1 | 2-May-09  | 0.56 (0.02) |
|                         | B1 | 9-Jun-09  | 0.40 (0.04) |
|                         | B1 | 10-Aug-09 | 0.57 (0.02) |
|                         | B2 | 16-Nov-08 | 0.77 (0.08) |
|                         | B2 | 4-Apr-09  | 0.42 (0.09) |
|                         | B2 | 3-May-09  | 0.07 (0.02) |
|                         | B2 | 9-Jun-09  | 0.24 (0.02) |
|                         | B3 | 16-Nov-08 | 1.57 (0.04) |
|                         | B3 | 9-Jun-09  | 0.31 (0.02) |
|                         | B3 | 10-Aug-09 | 0.42 (0.02) |
| Alder runoff            | B4 | 2-Nov-08  | 0.20 (0.03) |
|                         | B4 | 15-Nov-08 | 0.52 (0.13) |
|                         | B4 | 2-May-09  | 0.19 (0.03) |
|                         | B4 | 9-Jun-09  | 0.71 (0.02) |
|                         | B4 | 10-Aug-09 | 1.16 (0.04) |
| Cabin runoff            | B5 | 3-May-09  | 0.23 (0.03) |
|                         | B5 | 16-May-09 | 0.08 (0.01) |
|                         | B5 | 9-Jun-09  | 3.71 (0.08) |
|                         | B5 | 10-Aug-09 | 6.16 (0.13) |
| Lake ice                | E1 | 28-Feb-09 | 1.01 (0.11) |
|                         | E2 | 28-Feb-09 | 1.97 (0.35) |
|                         | E2 | 4-Apr-09  | 0.44 (0.04) |
|                         | T6 | 28-Feb-09 | 2.01 (0.49) |
|                         | T6 | 2-May-09  | 0.48 (0.02) |
|                         | T6 | 3-May-09  | 2.24 (0.05) |
|                         | D1 | 4-Apr-09  | 0.56 (0.22) |

|                     |         |           |             |
|---------------------|---------|-----------|-------------|
| Castle Lake outflow | O       | 3-May-09  | 0.88 (0.03) |
|                     | O       | 19-May-09 | 0.88 (0.04) |
|                     | O       | 9-Jun-09  | 1.54 (0.07) |
|                     | O       | 5-Jul-09  | 2.06 (0.06) |
|                     | O       | 6-Jul-09  | 2.27 (0.07) |
| Wetland             | Wetland | 6-Jul-09  | 2.10 (0.04) |
| Alder spring        | M5      | 16-Jun-09 | 2.72 (0.04) |
